# Supplementary material for: Mapping Neural Circuits with Activity-Dependent Nuclear Import of a Transcription Factor
Source: PubMed Central journal article supplement (PMC3357894; doi:10.3109/01677063.2011.642910), 2012-01-12
Supplement: gneg26-89-SD1.pdf [file gneg26-89-SD1.pdf]

Supplementary materials for Masuyama K, Zhang Y, Rao Y, Wang J W. Mapping Neural Circuits with Activity-Dependent Nuclear Import of a Transcription Factor, *J. Neurogenetics*, 2012; 26(1): 89–102.

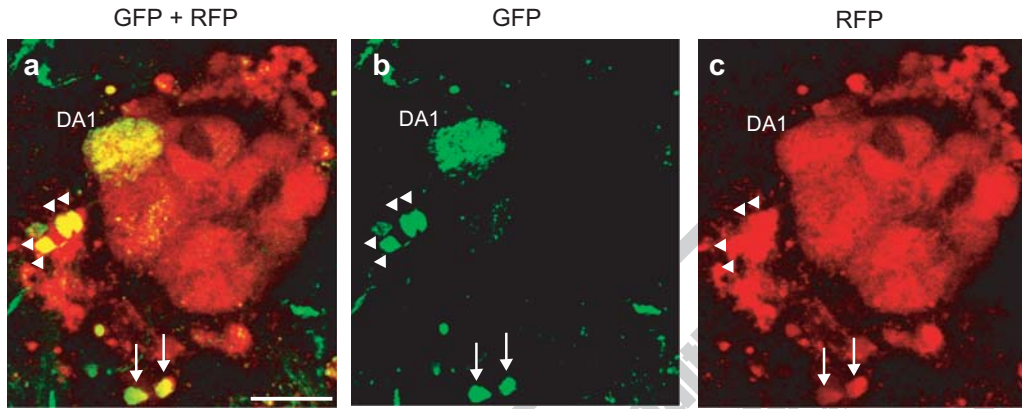

**Supplementary Figure 1.** Visualizing active PNs with GFP and all GH146 PNs with RFP. **(a)** Confocal image of the antennal lobe of a fly bearing the *GH146-Gal4*, *UAS-mLexA-VP16-NFAT*, *UAS-CD8-RFP*, *LexAop-CD2-GFP*, and *LexAop-CD8-GFP-2A-CD8-GFP* transgenes. After exposed to cVA for 24 hours, GFP is expressed in the DA1 PNs (green color) of a test fly. All GH146 PNs express RFP (red color). **(b)** Confocal image same as **a**, with only the green channel. **(c)** Confocal image same as **a**, with only the red channel. Arrows indicate PN cell bodies in the ventral cluster. Arrow heads indicate PN cell bodies in the lateral cluster. Scale bar = 20  $\mu$ m.

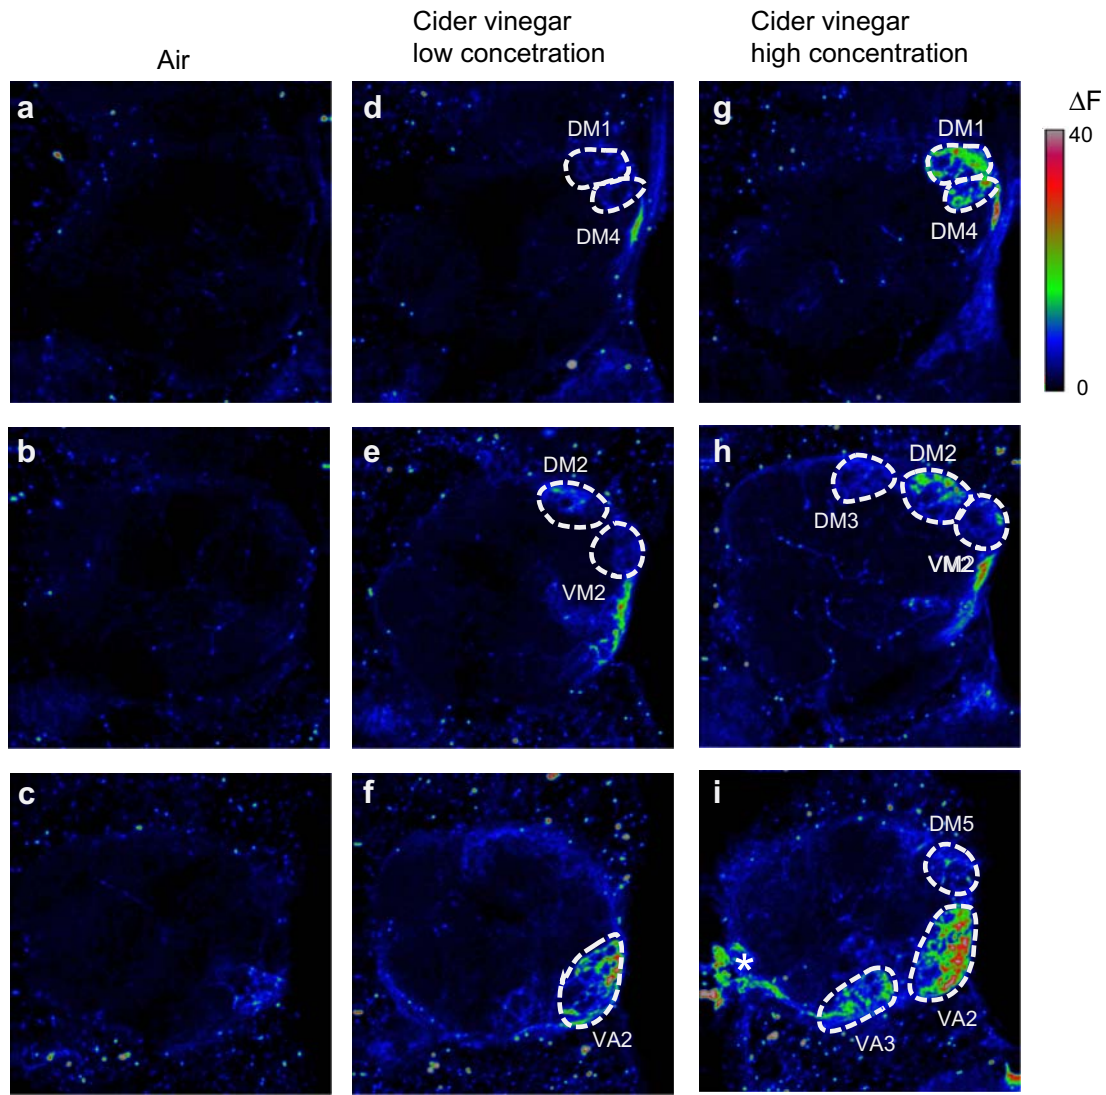

**Supplementary Figure 2.** Glomerular pattern in response to cider vinegar at different concentrations. A higher concentration of cider vinegar excites more glomeruli and induces more GFP expression in the same glomerulus. GFP fluorescence in antennal lobe detected by two-photon microscopy is shown as pseudocolored images. Male flies bearing the *Or83b-Gal4*, *UAS-mLexA-VP16-NFAT*, *LexAop-CD2-GFP*, and *LexAop-CD8-GFP-2A-CD8-GFP* transgenes were exposed to air (500 mL/min; **a-c**), low concentration (83 mL/min; **d-f**), or high concentration of cider vinegar (500 mL/min; **g-i**) for 24 hours.
